# Supplementary material for: In-plane graphene/boron-nitride heterostructures as an efficient metal-free electrocatalyst for the oxygen reduction reaction
Source: Royal Society of Chemistry journal article supplement (doi:10.1039/c6nr03288e), 2016-01-01
Supplement: c6nr03288e1.pdf [file c6nr03288e1.pdf]

## **In-plane Graphene/Boron-Nitride Heterostructure as Efficient Metal-Free Electrocatalyst for the Oxygen Reduction Reaction**

Qiao Sun,<sup>a</sup> Caixia Sun,<sup>b</sup> Aijun Du,<sup>c</sup> Shixue Dou,<sup>d</sup> and Zhen Li<sup>\*a,d</sup>

<sup>a</sup> Collaborative Innovation Center of Radiation Medicine of Jiangsu Higher Education Institutions, School of Radiation Medicine and Protection, Medical College of Soochow University, Soochow University, Suzhou 215123, China. Email: zhenli@suda.edu.cn

<sup>b</sup> Key Laboratory for Ultrafine Materials of the Ministry of Education, Shanghai Key Laboratory of Advanced Polymeric Materials, School of Materials Science and Engineering, East China University of Science and Technology, Shanghai 200237, China.

<sup>c</sup> School of Chemistry, Physics and Mechanical Engineering, Queensland University of Technology, Brisbane, QLD 4001, Australia.

<sup>d</sup> Institute of Superconducting & Electronic Materials, The University of Wollongong, NSW 2500, Australia. Email: zhenl@uow.edu.au

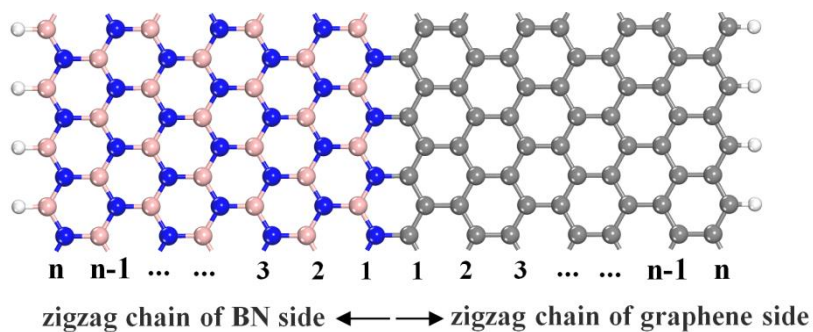

**Figure S1.** Geometry structure of zigzag type G/BN( $n,n$ ) nanoribbons.

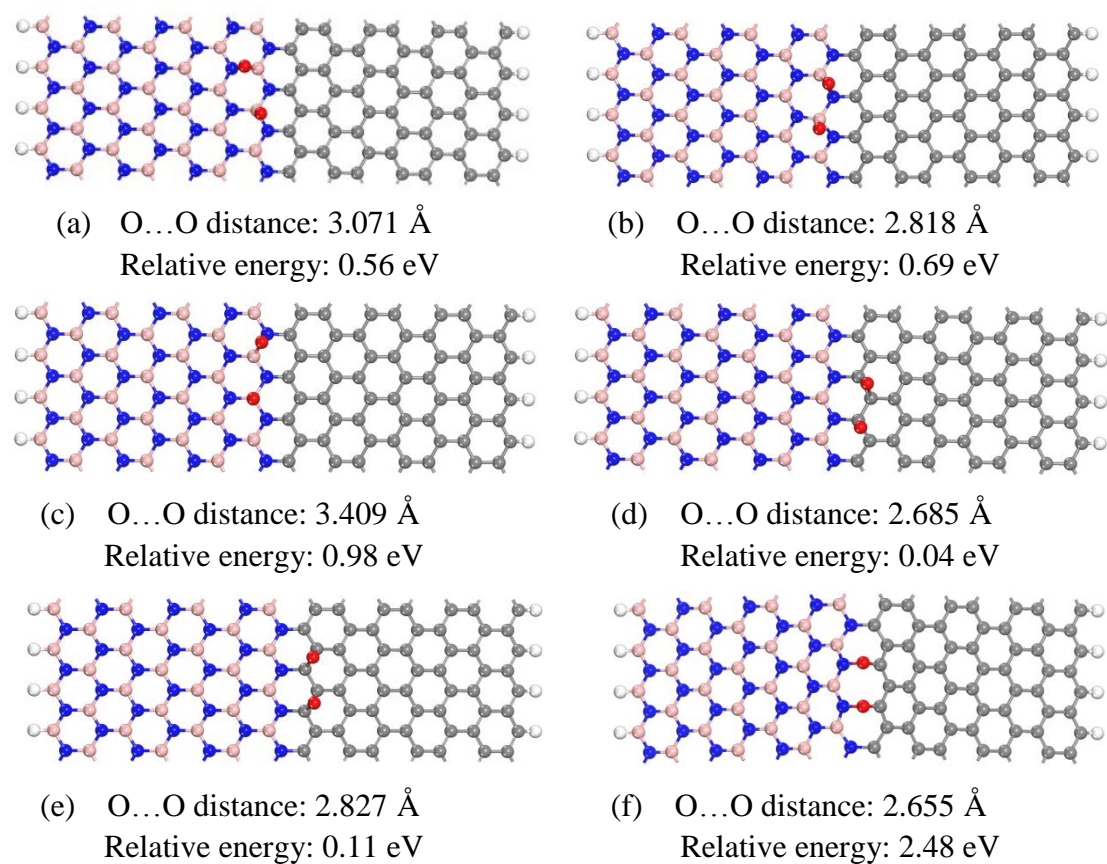

**Figure S2.** The optimized structures of the  $O_2$  dissociation reaction.

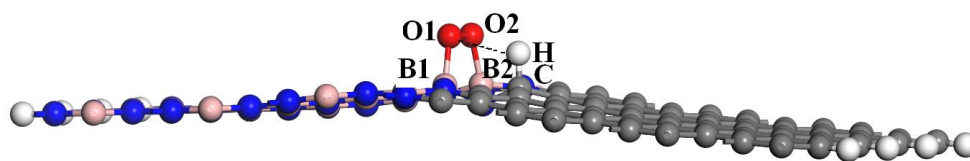

O1...H distance: 2.340 Å

Relative energy: 0.54 eV

**Figure S3.** The structure (OO\*...H\*) of H binding to C atom at the interface of G/BN(7,7) nanoribbon.

**Table S1.** Mulliken charge distribution (e) of B atoms on the heterointerface of different sizes of G/BN nanoribbons and the changes in charge distribution before and after O<sub>2</sub> is adsorbed on the heterointerface of the G/BN nanoribbons, as well as the Mulliken charge distribution of O atoms for the chemisorption of O<sub>2</sub> on G/BN nanoribbons with different sizes.

| Index        | Charge of B atom on the interface of G/BN | Charge of B atom on the interface of G/BN-O <sub>2</sub> | Change in charge of B atom on the interface of G/BN nanoribbon before and after O <sub>2</sub> adsorption | Charge of O atom on the G/BN-O <sub>2</sub> |
|--------------|-------------------------------------------|----------------------------------------------------------|-----------------------------------------------------------------------------------------------------------|---------------------------------------------|
| G/BN (3,3)   | 0.436                                     | 0.591                                                    | 0.155                                                                                                     | -0.238                                      |
| G/BN (4,4)   | 0.416                                     | 0.576                                                    | 0.160                                                                                                     | -0.243                                      |
| G/BN (5,5)   | 0.410                                     | 0.571                                                    | 0.161                                                                                                     | -0.245                                      |
| G/BN (6,6)   | 0.409                                     | 0.571                                                    | 0.162                                                                                                     | -0.247                                      |
| G/BN (7,7)   | 0.408                                     | 0.570                                                    | 0.162                                                                                                     | -0.248                                      |
| G/BN (8,8)   | 0.408                                     | 0.570                                                    | 0.162                                                                                                     | -0.249                                      |
| G/BN (9,9)   | 0.408                                     | 0.570                                                    | 0.162                                                                                                     | -0.249                                      |
| G/BN (10,10) | 0.408                                     | 0.570                                                    | 0.162                                                                                                     | -0.250                                      |

**Table S2.** Bond distance ( $r$ ) in Å, binding energy ( $E_{ad}$ ) in eV of O<sub>2</sub> adsorbed on G/BN nanoribbons with different sizes of graphene and BN as well as the charge transfer (CT) in electron from G/BN to O<sub>2</sub>\* of these configurations.

| index      | r(O–O) | r(O–B) | r(B–B) | CT     | $E_{ad}$ |
|------------|--------|--------|--------|--------|----------|
| G/BN (3,7) | 1.423  | 1.580  | 2.339  | -0.480 | -0.56    |
| G/BN (4,7) | 1.426  | 1.574  | 2.336  | -0.488 | -0.69    |
| G/BN (5,7) | 1.430  | 1.571  | 2.334  | -0.492 | -0.75    |
| G/BN (6,7) | 1.431  | 1.568  | 2.332  | -0.494 | -0.78    |
| G/BN (7,7) | 1.431  | 1.567  | 2.329  | -0.496 | -0.80    |
| G/BN (7,3) | 1.430  | 1.564  | 2.321  | -0.490 | -0.83    |
| G/BN (7,4) | 1.432  | 1.562  | 2.330  | -0.494 | -0.82    |
| G/BN (7,5) | 1.431  | 1.565  | 2.329  | -0.494 | -0.82    |
| G/BN (7,6) | 1.433  | 1.564  | 2.331  | -0.494 | -0.81    |
| G/BN (7,7) | 1.431  | 1.567  | 2.329  | -0.496 | -0.80    |
